# Supplementary material for: Rhamnolipid Nano-Micelles versus Alcohol-Based Hand Sanitizer: A Comparative Study for Antibacterial Activity against Hospital-Acquired Infections and Toxicity Concerns
Source: MDPI journal article supplement (doi:10.3390/antibiotics11050605), 2022-04-29
Supplement: s1 [file s1]

## Supplementary Materials

**Table S1.** Congeners composition of rhamnolipids [Rha(s)] mixture produced by *P. aeruginosa* strain LeS3 as analyzed by LC/ESI-MS in both positive and negative modes.

| Rha(s) congeners                                                                                                                                                                                                                                                                                                  | <i>m/z</i>                                      |        |                    |                    |                     |                    |                                     | % abundance |
|-------------------------------------------------------------------------------------------------------------------------------------------------------------------------------------------------------------------------------------------------------------------------------------------------------------------|-------------------------------------------------|--------|--------------------|--------------------|---------------------|--------------------|-------------------------------------|-------------|
|                                                                                                                                                                                                                                                                                                                   | Mol f                                           | Mol wt | [M-H] <sup>-</sup> | [M+H] <sup>+</sup> | [M+Na] <sup>+</sup> | [M+K] <sup>+</sup> | [M-H+Na <sub>2</sub> ] <sup>+</sup> |             |
| <b>Mono-rhamnolipid (rhamnolipid 1) congeners</b>                                                                                                                                                                                                                                                                 |                                                 |        |                    |                    |                     |                    |                                     |             |
| R -C <sub>8</sub>                                                                                                                                                                                                                                                                                                 | C <sub>14</sub> H <sub>26</sub> O <sub>7</sub>  | 306    |                    |                    |                     |                    | 351                                 | 12.8        |
| R-C <sub>8:1</sub>                                                                                                                                                                                                                                                                                                | C <sub>14</sub> H <sub>24</sub> O <sub>7</sub>  | 304    |                    |                    | 327                 |                    |                                     | 25.2        |
| R-C <sub>8:2</sub>                                                                                                                                                                                                                                                                                                | C <sub>14</sub> H <sub>22</sub> O <sub>7</sub>  | 302    |                    |                    | 325                 |                    |                                     | 29.4        |
| R -C <sub>9:1</sub>                                                                                                                                                                                                                                                                                               | C <sub>15</sub> H <sub>26</sub> O <sub>7</sub>  | 318    |                    |                    | 341                 |                    |                                     | 0.3         |
| R-C <sub>10</sub>                                                                                                                                                                                                                                                                                                 | C <sub>16</sub> H <sub>30</sub> O <sub>7</sub>  | 334    |                    |                    | 357                 |                    | 379                                 | 13.6        |
| R-C <sub>10:2</sub>                                                                                                                                                                                                                                                                                               | C <sub>16</sub> H <sub>26</sub> O <sub>7</sub>  | 330    |                    |                    | 353                 |                    |                                     | 0.12        |
| R-C <sub>12</sub>                                                                                                                                                                                                                                                                                                 | C <sub>18</sub> H <sub>34</sub> O <sub>7</sub>  | 362    |                    |                    | 385                 |                    |                                     | 0.24        |
| R-C <sub>12:2</sub>                                                                                                                                                                                                                                                                                               | C <sub>18</sub> H <sub>30</sub> O <sub>7</sub>  | 358    |                    | 359                | 381                 |                    |                                     | 2.28        |
| R-C <sub>13</sub>                                                                                                                                                                                                                                                                                                 | C <sub>19</sub> H <sub>36</sub> O <sub>7</sub>  | 376    |                    |                    |                     |                    | 421                                 | 0.56        |
| R-C <sub>13:2</sub>                                                                                                                                                                                                                                                                                               | C <sub>19</sub> H <sub>32</sub> O <sub>7</sub>  | 372    |                    |                    | 395                 |                    |                                     | 0.8         |
| R-C <sub>14</sub>                                                                                                                                                                                                                                                                                                 | C <sub>20</sub> H <sub>38</sub> O <sub>7</sub>  | 390    |                    |                    | 413                 |                    |                                     | 0.06        |
| R-C <sub>15</sub>                                                                                                                                                                                                                                                                                                 | C <sub>21</sub> H <sub>40</sub> O <sub>7</sub>  | 404    |                    |                    |                     | 443                |                                     | 0.24        |
| R-C <sub>8</sub> -C <sub>12</sub> , R-C <sub>9</sub> -C <sub>11</sub> , R-C <sub>10</sub> -C <sub>10</sub> , R-C <sub>12</sub> -C <sub>8</sub> , R-C <sub>11</sub> -C <sub>9</sub>                                                                                                                                | C <sub>26</sub> H <sub>48</sub> O <sub>9</sub>  | 504    | 503                |                    | 527                 | 543                |                                     | 6.8         |
| R-C <sub>8</sub> -C <sub>14</sub> , R-C <sub>9</sub> -C <sub>13</sub> , R-C <sub>10</sub> -C <sub>12</sub> , R-C <sub>11</sub> -C <sub>11</sub>                                                                                                                                                                   | C <sub>28</sub> H <sub>52</sub> O <sub>9</sub>  | 532    | 531                |                    |                     |                    | 577                                 | 0.52        |
| R-C <sub>8</sub> -C <sub>14:1</sub> , R-C <sub>9</sub> -C <sub>13:1</sub> , R-C <sub>10</sub> -C <sub>12:1</sub> , R-C <sub>11</sub> -C <sub>11:1</sub> , R-C <sub>8:1</sub> -C <sub>14</sub> , R-C <sub>9:1</sub> -C <sub>13</sub> , R-C <sub>10:1</sub> -C <sub>12</sub> , R-C <sub>11:1</sub> -C <sub>11</sub> | C <sub>28</sub> H <sub>50</sub> O <sub>9</sub>  | 530    |                    |                    | 553                 |                    |                                     | 0.6         |
| R-C <sub>11</sub> -C <sub>16</sub> , R-C <sub>12</sub> -C <sub>15</sub> , R-C <sub>13</sub> -C <sub>14</sub>                                                                                                                                                                                                      | C <sub>33</sub> H <sub>62</sub> O <sub>9</sub>  | 602    |                    | 603                |                     | 641                |                                     | 0.52        |
| R-C <sub>14</sub> -C <sub>16:2</sub> , R-C <sub>15</sub> -C <sub>15:2</sub> , R-C <sub>14:2</sub> -C <sub>16</sub> , R-C <sub>15:2</sub> -C <sub>15</sub>                                                                                                                                                         | C <sub>36</sub> H <sub>64</sub> O <sub>9</sub>  | 640    |                    | 641                |                     |                    |                                     | 0.8         |
| <b>Di-rhamnolipid (rhamnolipid 2) congeners</b>                                                                                                                                                                                                                                                                   |                                                 |        |                    |                    |                     |                    |                                     |             |
| R-R-C <sub>12:1</sub>                                                                                                                                                                                                                                                                                             | C <sub>24</sub> H <sub>42</sub> O <sub>11</sub> | 506    |                    |                    |                     |                    | 551                                 | 0.22        |
| R-R-C <sub>16:1</sub>                                                                                                                                                                                                                                                                                             | C <sub>28</sub> H <sub>50</sub> O <sub>11</sub> | 562    |                    |                    |                     | 601                |                                     | 0.62        |
| R-R-C <sub>8</sub> -C <sub>10:2</sub> , R-R-C <sub>9</sub> -C <sub>9:2</sub> , R-R-C <sub>8:2</sub> -C <sub>10</sub> , R-R-C <sub>9:2</sub> -C <sub>9</sub>                                                                                                                                                       | C <sub>30</sub> H <sub>50</sub> O <sub>13</sub> | 618    |                    |                    | 641                 | 657                |                                     | 1.42        |
| R-R-C <sub>8</sub> -C <sub>12</sub> , R-R-C <sub>9</sub> -C <sub>11</sub> , R-R-C <sub>10</sub> -C <sub>10</sub> , R-R-C <sub>12</sub> -C <sub>8</sub> , R-R-C <sub>11</sub> -C <sub>9</sub> ,                                                                                                                    | C <sub>32</sub> H <sub>58</sub> O <sub>13</sub> | 650    | 649                |                    | 673                 |                    |                                     | 1.6         |
| R-R-C <sub>16</sub> -C <sub>16:2</sub> , R-R-C <sub>16:2</sub> -C <sub>16</sub>                                                                                                                                                                                                                                   | C <sub>44</sub> H <sub>78</sub> O <sub>13</sub> | 815    |                    | 816                |                     |                    |                                     | 0.03        |
| Mol F, Molecular formula                                                                                                                                                                                                                                                                                          |                                                 |        |                    |                    |                     |                    |                                     |             |
| Mol wt, Molecular weight                                                                                                                                                                                                                                                                                          |                                                 |        |                    |                    |                     |                    |                                     |             |
| R, Rhamnose                                                                                                                                                                                                                                                                                                       |                                                 |        |                    |                    |                     |                    |                                     |             |
